# Supplementary material for: Characterization of the GntR family regulator HpaR1 of the crucifer black rot pathogen Xanthomonas campestris pathovar campestris
Source: PubMed Central journal article supplement (PMC4730234; doi:10.1038/srep19862), 2016-01-28
Supplement: srep19862-s1.pdf [file srep19862-s1.pdf]

## Supplementary information

Title: Characterization of the GntR family regulator HpaR1 of the crucifer black rot pathogen *Xanthomonas campestris* pathovar *campestris*.

Authors: Hui-Zhao Su, Liu Wu, Yan-Hua Qi, Guo-Fang Liu, Guang-Tao Lu & Ji-Liang Tang

```

8004      AACGCCGTCAAAAAAATGGCGTGTGTGCC TTGCGATGTGTTCTATGCCATAGTGC 60
B-1459    AACGCCGTCAAAAAAATGGCGTGTGTGCC TTGCGATGTGTTCTATGCCATAGTGC 60
B100     AACGCCGTCAAAAAAATGGCGTGTGTGCC TTGCGATGTGTTCTATGCCATAGTGC 60
33913    AACGCCGTCAAAAAAATGGCGTGTGTGCC TTGCGATGTGTTCTATGCCATAGTGC 60
          *****

8004      ACTGCAACACGCGATTCAATGTTGGTCCC GGACCGTGTCTCGGGATGCAACTTCTGTTCGTA 120
B-1459    ACTGCAACACGCGATTCAACGTTGGTCCC GGACCGTGTCTCGGGATGCAACTTCTGTTCGTA 120
B100     ACTGCAACACGCGATTCAACGTTGGTCCC GGACCGTGTCTCGGGATGCAACTTCTGTTCGTA 120
33913    ACTGCAACACGCGATTCAATGTTGGTCCC GGACCGTGTCTCGGGATGCAACTTCTGTTCGTA 120
          *****

8004      CGTTCGTGCTGGCGCCTGAGCCGGTTGAATGCTGCGCGAGGTCCTGTCCCACCCAACAGA 180
B-1459    CGTTCGTGCTGGCGCCTGAGCCGGTTGAATGCTGCGCGAGGTCCTGTCCCACCCAACAGA 180
B100     CGTTCGTGCTGGCGCCTGAGCCGGTTGAATGCTGCGCGAGGTCCTGTCCCACCCAACAGA 180
33913    CGTTCGTGCTGGCGCCTGAGCCGGTTGAATGCTGCGCGAGGTCCTGTCCCACCCAACAGA 180
          *****

8004      GGCAGCCAGCTACACGCATGAAGAAACTGATCGGACGACTCTGC CAAGGCCCTCAGCCTG 239
B-1459    GGCAGCCAGCTACACGCATGAAGAAACTGATCGGACGACTCTGC CAAGGCCCTCAGCCTG 240
B100     GGCAGCCAGCTACACGCATGAAGAAACTGATCGGACGACTCTGC CAAGGCCCTCAGCCTG 239
33913    GGCAGCCAGCTACACGCATGAAGAAACTGATCGGACGACTCTGC CAAGGCCCTCAGCCTG 239
          *****

8004      GCTCTGCTCTGCTCGATG 257
B-1459    GCTCTGCTCTGCTCGATG 258
B100     GCTCTGCTCTGCTCGATG 257
33913    GCTCTGCTCTGCTCGATG 257
          *****

```

**Supplementary Figure 1.** Comparison of the 255-bp *gumB* promoter sequences of *Xcc* strains 8004, ATCC33913, B100 and B-1459. Rectangular squares indicate the bases in the strains differ from one another. The predicted translation start site ATG in strain B-1459 is underlined.

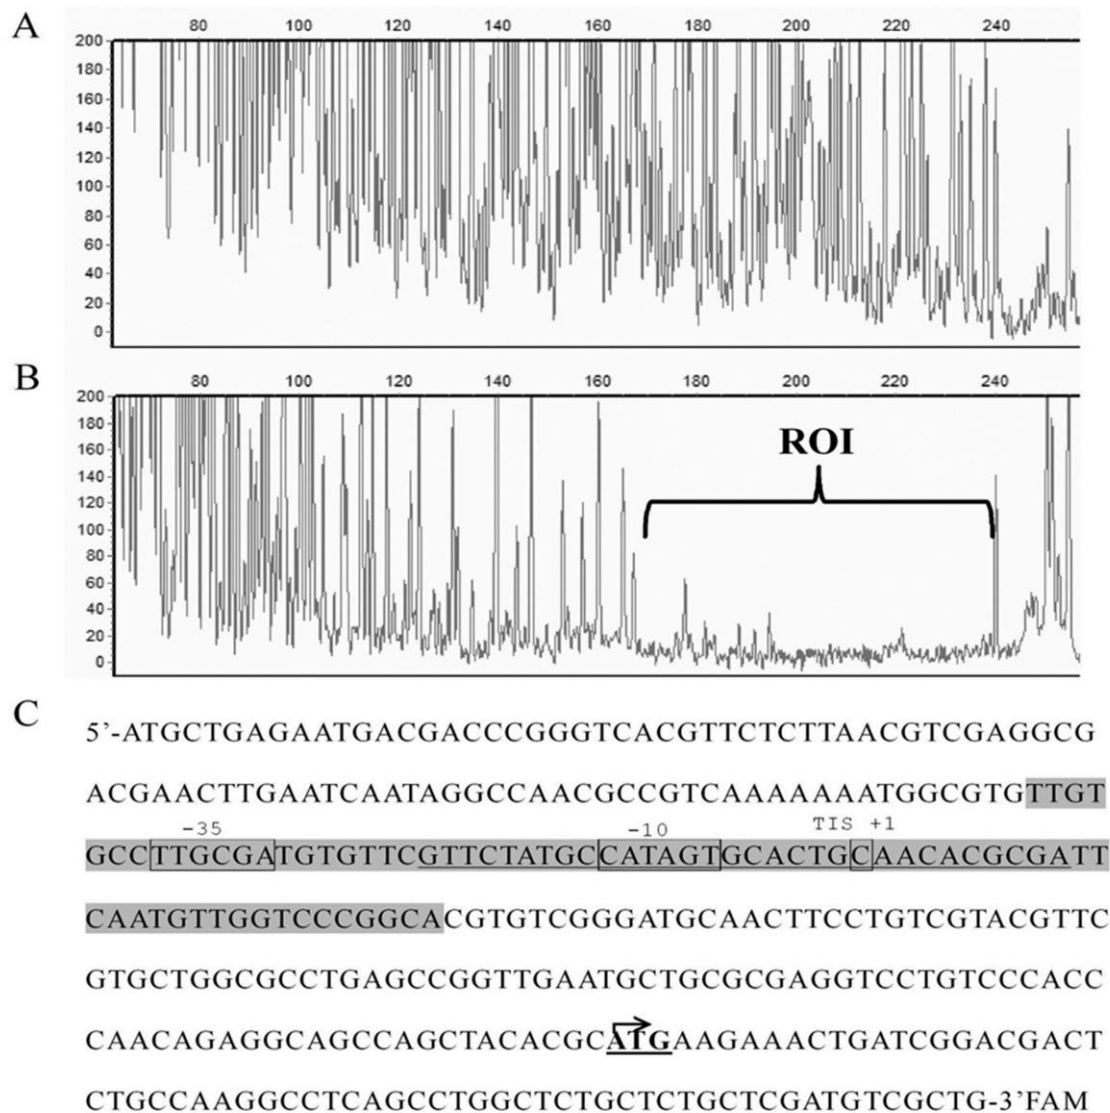

**Supplementary Figure 2.** Determination of the RNA polymerase binding region in the *gumB* promoter of *Xcc* strain 8004 by dye primer-based DNase I footprint assay. Electropherograms show the protection pattern of the *gumB* promoter after digestion with DNase I following incubation in the absence (**A**) or presence (**B**) of 1 U *E. coli* RNA polymerase (RNAP). ROI, region of interest. (**C**) DNA sequence of 330-bp fragment (labelled with FAM at the 3' end) used in this assay. The protected region by RNAP, i.e. the RNAP-binding region, is shown in the grey background (-41 to +29 relative to the transcription initiation site). The HpaR1 binding site is underlined. The transcription initiation site is indicated by a square, and the putative translation start codon ATG is underlined. The -35 and -10 elements are boxed.

**Supplementary Table 1.** Primers used in this study

| Primer                        | Nucleotide sequence (5'→3')                                                                  | The amplified segment or the primer location                                                                                                                                                                                     |
|-------------------------------|----------------------------------------------------------------------------------------------|----------------------------------------------------------------------------------------------------------------------------------------------------------------------------------------------------------------------------------|
| Pgum-1F<br>Pgum-1R            | ACAGTTGAATTCGGCCCATGTTCGCAAGACGTG<br>ACAGTTGGATCCATCGAGCAGAGCAGAGCCAG                        | 546-bp DNA sequence upstream of the start codon of <i>gumB</i> of <i>Xcc</i> strain B-1459 (include ATG), used for construction of reporter plasmids and site-directed mutagenesis.                                              |
| Pgum-2F<br>Pgum-2R            | AACAACAGGCCCATGTTCGCA<br>CATCGAGCAGAGCAGAGCCAG                                               | 529-bp DNA sequence upstream of the start codon of <i>gumB</i> of <i>Xcc</i> strain B-1459 (include ATG), used for EMSA, FAM-labeled.                                                                                            |
| Pgum-3F<br>Pgum-3R            | ATGCTGAGAATGACGACCCGGG<br>CAGCGACATCGAGCAGAGCAGA                                             | 330-bp DNA fragments spanning nucleotides -164 to +166 from the transcription initiation site of the <i>gumB</i> promoter region of <i>Xcc</i> strain B-1459, used for Dye primer-based DNase I footprint assay, FAM-labelled.   |
| Pgum-4F<br>Pgum-4R            | GTCGAGGCGACGAACTTGAA<br>CATCGAGCAGAGCAGAGCCAG                                                | 287-bp DNA sequence upstream of the start codon of <i>gumB</i> of <i>Xcc</i> strain B-1459 (include ATG), used for EMSA, FAM-labelled.                                                                                           |
| gumivtF<br>gumivtR            | AACAACAGGCCCATGTTCGCAAG<br>CGCTCCAGATCGTCGATCTGAAAC                                          | 678-bp DNA fragments including the promoter region and 209-bp coding region downstream of the start codon of <i>gumB</i> of <i>Xcc</i> strain 8004, used for <i>in vitro</i> transcription assay.                                |
| gumivt-1F<br>gumivt-1R        | AATGTTGGTCCCGGCACGTG<br>CGCTCCAGATCGTCGATCTGAAAC                                             | 329-bp DNA fragments including 209-bp coding region downstream of the start codon of <i>gumB</i> of <i>Xcc</i> strain 8004, without the -35 and -10 promoter elements, used as a control in <i>in vitro</i> transcription assay. |
| gumNF<br>gumNR                | GATCTGTTGCTGGTGAAGGTGTTTC<br>CTGAAGGTAGCCAGCGCGATA                                           | 171-bp internal fragment of <i>gumB</i> , used for qRT-PCR.                                                                                                                                                                      |
| RTPgum1<br>RTPgum2<br>RTPgum3 | TCGTCCACTGCACCAAGTGACCGTGA<br>TGACCGTTCTGGTCGATGCGGACCT<br>CATCGAGCAGAGCAGAGCCAG             | located in <i>gumB</i> ORF, used for 5'-RACE                                                                                                                                                                                     |
| PM1F<br>PM1R                  | CCTTGCGATGTGTTCTTTCTATGCCATAGTGC<br>GCACTATGGCATAGAAAGAACACATCGCAAGG                         | Used for creating M1 DNA fragment with point mutation.                                                                                                                                                                           |
| PM2F<br>PM2R                  | CCTTGCGATGTGTTGCTCTATGCCATAGTGAC<br>GTGCACTATGGCATAGAGCGAACACATCGCAAGG                       | Used for creating M2 DNA fragment with point mutation.                                                                                                                                                                           |
| PM3F<br>PM3R                  | GCGATGTGTTGTTCTATGCCACAGTGCACTGCAA<br>CACGCG<br>CGCGTGTTCAGTGCACTGTGGCATAGAACGAAC<br>ACATCGC | Used for creating M3 DNA fragment with point mutation.                                                                                                                                                                           |
| PM4F<br>PM4R                  | GATGTGTTGTTCTATGCCATCGTGCACTGCAACA<br>CGCG<br>CGCGTGTTCAGTGCACTGTGGCATAGAACGAAC<br>ACATC     | Used for creating M4 DNA fragment with point mutation.                                                                                                                                                                           |
| PM5F<br>PM5R                  | CTATGCCATAGTGCACTTCAACACGCGATTCAATG<br>CATTGAATCGCGTGTGAAGTGCATATGGCATAG                     | Used for creating M5 DNA fragment with point mutation.                                                                                                                                                                           |
| PM6F<br>PM6R                  | CTATGCCATAGTGCACTGCCACACGCGATTCAATG<br>TTGG<br>CCAACATTGAATCGCGTGTGGCAGTGCACTATGGC<br>ATAG   | Used for creating M6 DNA fragment with point mutation.                                                                                                                                                                           |

|                |                                                                                               |                                                                                                                                                                         |
|----------------|-----------------------------------------------------------------------------------------------|-------------------------------------------------------------------------------------------------------------------------------------------------------------------------|
| 1045F<br>1045R | CGACGACGTTTGAGCACGCCGTCCTAT<br>AAGCCGCTGTTCATCTGGTCCGCCA                                      | 311-bp DNA sequence including the promoter region and 122-bp coding region of the gene <i>XC_1045</i> , used for EMSA, FAM-labelled.                                    |
| 3077F<br>3077R | TCTCACTCTGTCTTGCAAACCTGCCA<br>AATGGGCATCGAAAACCCAGAAGC                                        | 890-bp DNA fragment including the promoter region and coding region of <i>hrpG</i> of <i>Xcc</i> strain 8004, used as a control in <i>in vitro</i> transcription assay. |
| 16SF<br>16SR   | GCCTAACACATGCAAGTCGAACGGC<br>AATATTCCCCACTGCTGCCTCCCG                                         | 325-bp DNA fragment of the 16S rDNA sequence, used for qRT-PCR.                                                                                                         |
| PD1F<br>PD1R   | TGTGCCTTGCGATGTGTTGTTCTATGCCATAGTGCA<br>CT<br>AGTGCACTATGGCATAGAACAACACATCGCAAGGC<br>ACA      | Used for creating <i>gumB</i> mutant promoter with one nucleotide deletion.                                                                                             |
| PD2F<br>PD2R   | TGTGCCTTGCGATGTGTTGTTCTATGCCATAGTGCA<br>CT<br>AGTGCACTATGGCATAGAACAACACATCGCAAGGCA<br>CA      | Used for creating <i>gumB</i> mutant promoter with two nucleotides deletion.                                                                                            |
| PIN1F<br>PIN1R | TGTGCCTTGCGATGTGTTCCGTTCTATGCCATAGT<br>GCACT<br>AGTGCACTATGGCATAGAACGGAACACATCGCAAG<br>GCACA  | Used for creating <i>gumB</i> mutant promoter with one nucleotide insertion.                                                                                            |
| PIN2F<br>PIN2R | TGTGCCTTGCGATGTGTTCCAGTTCTATGCCATAGT<br>GCACT<br>AGTGCACTATGGCATAGAACGGAACACATCGCAA<br>GGCACA | Used for creating <i>gumB</i> mutant promoter with two nucleotides insertion.                                                                                           |
| PIN3F<br>PIN3R | TGTGCCTTGCGATGTGTTCCAGTTCTATGCCATAG<br>TGCCT<br>AGTGCACTATGGCATAGAACGGAACACATCGCA<br>AGGCACA  | Used for creating <i>gumB</i> mutant promoter with three nucleotides insertion.                                                                                         |

**Supplementary Table 2.** Strains and plasmids used in this study

| Strains or plasmids                        | Relevant characteristics                                                                                                                                                               | Reference or source          |
|--------------------------------------------|----------------------------------------------------------------------------------------------------------------------------------------------------------------------------------------|------------------------------|
| <i>E. coli</i>                             |                                                                                                                                                                                        |                              |
| JM109                                      | <i>RecA1, endA1, gyrA96, thi, supE44, relA1Δ (lac-proAB)/F' [traD36, lacI<sup>f</sup>, lacZ ΔM15]</i>                                                                                  | (1)                          |
| DH5α                                       | Φ80Δ <i>lacZ</i> M15 <i>recA1 endA1 deoR</i>                                                                                                                                           | Gibco BRL, Life Technologies |
| JM109/pQE-30-2736                          | JM109 harbouring pQE-30-2736                                                                                                                                                           | (2)                          |
| <i>X. campestris</i> pv. <i>campestris</i> |                                                                                                                                                                                        |                              |
| 8004                                       | Wild type, Rif <sup>r</sup>                                                                                                                                                            | (3)                          |
| 2736nk                                     | As 8004, but <i>XC_2736::pK18mob</i> , non-polar effect. Rif <sup>r</sup> , Kan <sup>r</sup>                                                                                           | (2)                          |
| 8004/pGUSgum                               | 8004 harbouring pGUSgum, Rif <sup>r</sup> Tet <sup>r</sup>                                                                                                                             | This work                    |
| 2736nk/pGUSgum                             | 2736nk harbouring pGUSgum, Rif <sup>r</sup> Kan <sup>r</sup> Tet <sup>r</sup>                                                                                                          | This work                    |
| Plasmids                                   |                                                                                                                                                                                        |                              |
| pLAFR6                                     | A promoterless derivative of pLAFR3, Tet <sup>r</sup>                                                                                                                                  | (4)                          |
| pRK2073                                    | Helper plasmid, Tra <sup>+</sup> , Mob <sup>+</sup> , ColE1, Spc <sup>r</sup> .                                                                                                        | (5)                          |
| pQE-30                                     | Expression vector, allowing the production of fusion proteins containing amino terminal 6xHis-tagged sequences. Amp <sup>r</sup>                                                       | Qiagen, Germany              |
| pQE-30-2736                                | pQE-30 containing a 360-bp fragment of <i>hpaR1</i> gene coding region.                                                                                                                | (2)                          |
| pL6gus                                     | pLAFR6 containing a 1,832-bp <i>gusA</i> ORF (excluding ATG), Tet <sup>r</sup>                                                                                                         | (6)                          |
| pGUSgum                                    | pLAFR6 containing 546-bp promoter region of the gene <i>gumB</i> fused to the coding region of <i>gusA</i> , Tet <sup>r</sup>                                                          | This work                    |
| pK18mob                                    | pUC18 derivative, <i>lacZα</i> Kan <sup>r</sup> , <i>mob</i> site. Suicide plasmid in <i>Xcc</i> .                                                                                     | (7)                          |
| pKgum                                      | The suicide plasmid pK18mob containing 546-bp <i>gumB</i> promoter.                                                                                                                    | This work                    |
| pGUSgum <sub>M1-6</sub>                    | pLAFR6 containing 546-bp <i>gumB</i> promoter with 6 different single mutated nucleotide, respectively, fused to the coding region of <i>gusA</i> , Tet <sup>r</sup>                   | This work                    |
| pGUSgum <sub>15</sub>                      | pLAFR6 containing the mutant <i>gumB</i> promoter with 1 nucleotide deletion in the spacer between -35 and -10 elements, fused to the coding region of <i>gusA</i> , Tet <sup>r</sup>  | This work                    |
| pGUSgum <sub>14</sub>                      | pLAFR6 containing the mutant <i>gumB</i> promoter with 2 nucleotides deletion in the spacer between -35 and -10 elements, fused to the coding region of <i>gusA</i> , Tet <sup>r</sup> | This work                    |
| pGUSgum <sub>17</sub>                      | pLAFR6 containing the mutant <i>gumB</i> promoter with 1 nucleotide insertion in the spacer between -35 and -10 elements, fused to the coding region of <i>gusA</i> , Tet <sup>r</sup> | This work                    |
| pGUSgum <sub>18</sub>                      | pLAFR6 containing the mutant <i>gumB</i> promoter with 2 nucleotides insertion in the spacer between -35 and -10 elements, fused to the                                                | This work                    |

|                       |                                                                                                                                                                                         |           |
|-----------------------|-----------------------------------------------------------------------------------------------------------------------------------------------------------------------------------------|-----------|
|                       | coding region of <i>gusA</i> , Tet <sup>r</sup>                                                                                                                                         |           |
| pGUSgum <sub>19</sub> | pLAFR6 containing the mutant <i>gumB</i> promoter with 3 nucleotides insertion in the spacer between -35 and -10 elements, fused to the coding region of <i>gusA</i> , Tet <sup>r</sup> | This work |

## References

1. Yanisch-Perron, C., Vieira, J. & Messing, J. Improved M13 phage cloning vectors and host strains: nucleotide sequences of the M13mp18 and pUC19 vectors. *Gene* **33**, 103–119 (1985).
2. An, S. Q. *et al.* Systematic mutagenesis of all predicted *gntR* genes in *Xanthomonas campestris* pv. *campestris* reveals a GntR family transcriptional regulator controlling hypersensitive response and virulence. *Mol. Plant-Microbe Interact.* **24**, 1027–1039 (2011).
3. Daniels, M. J. *et al.* Cloning of genes involved in pathogenicity of *Xanthomonas campestris* pv. *campestris* using the broad host range cosmid pLAFR1. *EMBO J.* **3**, 3323–3328 (1984).
4. Huynh, T. V., Dahlbeck, D. & Staskawicz, B. J. Bacterial blight of soybean: regulation of a pathogen gene determining host cultivar specificity. *Science* **245**, 1374–1377 (1989).
5. Leong, S. A., Ditta, G. S. & Helinski, D. R. Heme biosynthesis in *Rhizobium*. Identification of a cloned gene coding for delta-aminolevulinic acid synthetase from *Rhizobium meliloti*. *J. Biol. Chem.* **257**, 8724–8730 (1982).
6. Jiang, B. L. *et al.* The type III secretion effector XopXccN of *Xanthomonas campestris* pv. *campestris* is required for full virulence. *Res. Microbiol.* **159**, 216–220 (2008).
7. Schäfer, A. *et al.* Small mobilizable multi-purpose cloning vectors derived from the *Escherichia coli* plasmids pK18 and pK19: selection of defined deletions in the chromosome of *Corynebacterium glutamicum*. *Gene* **145**, 69–73 (1994).
